# Supplementary material for: Facile synthesis and characterization of ultrathin cerium oxide nanorods
Source: Royal Society of Chemistry journal article supplement (doi:10.1039/c004270f), 2010-01-01
Supplement: c004270f.pdf [file c004270f.pdf]

## Electronic Supplementary Information (ESI) for Facile synthesis and characterization of ultrathin cerium oxide nanorods

Yefeng Yang, Yizheng Jin,\* Haiping He and Zhizhen Ye\*

*State Key Laboratory of Silicon Materials, Department of Materials Science and Engineering,  
Zhejiang University, Hangzhou 310027, P.R. China.*

*E-mail: yizhengjin@zju.edu.cn and yezz@zju.edu.cn*

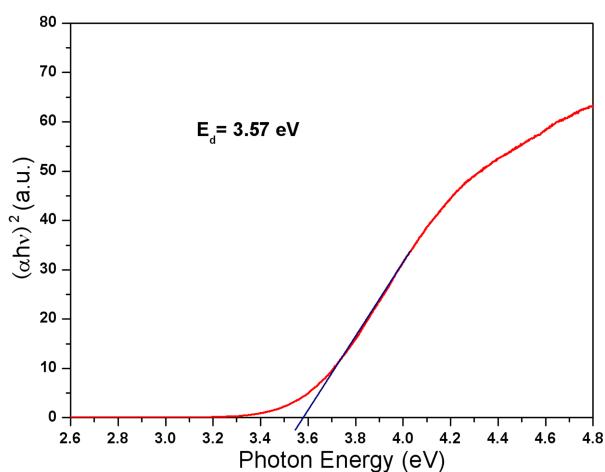

**Fig. S1** Plot of  $(\alpha h\nu)^2$  vs photon energy for the ultrathin CeO<sub>2</sub> nanorods dispersed in chloroform for the calculation of the direct bandgap energy.

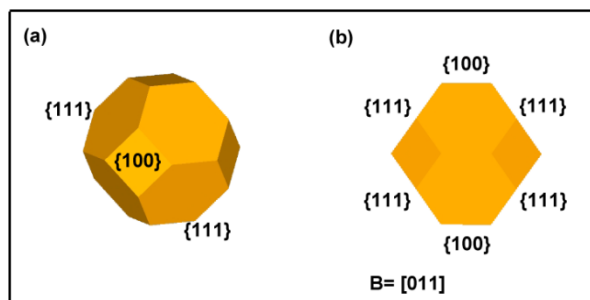

**Fig. S2** (a) A 3D structural model of a truncated octahedron bounded with eight {111} and six {100} planes. (b) a 2D image projected along the [011] direction of a truncated octahedron.

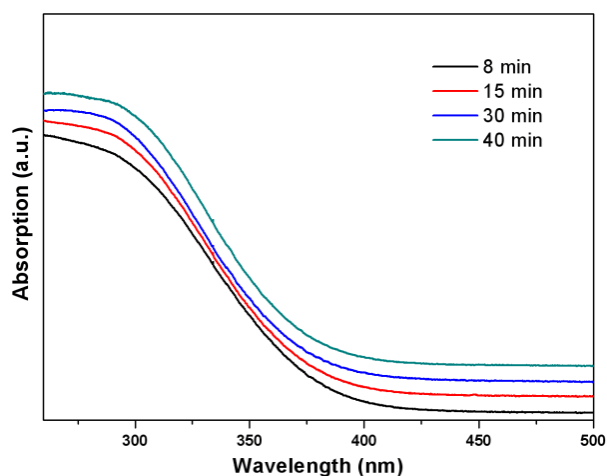

**Fig. S3** Temporal evolution of the UV-Vis spectra of the CeO<sub>2</sub> nanocrystals. As the shape of the nanocrystals evolves from particles to short rods, and then to much longer rods, the UV-Vis absorption edges show no obvious redshift, reflecting the constancy of the nanorod diameters during growth.
